# Supplementary material for: Hierarchically ordered nanostructures of a supramolecular rod-coil block copolymer with a hydrogen-bonded discotic mesogen
Source: Royal Society of Chemistry journal article supplement (doi:10.1039/c8py01726c), 2019-01-01
Supplement: c8py01726c1.pdf [file c8py01726c1.pdf]

*Electronic Supplementary Information (ESI) for*

## **Hierarchically ordered nanostructures of a supramolecular rod–coil block copolymer with a hydrogen-bonded discotic mesogen**

Hongbing Pan, Wei Zhang, Anqi Xiao, Xiaolin Lyu, Pingping Hou, Zhihao Shen,\* and Xinghe Fan\*

Beijing National Laboratory for Molecular Sciences, Key Laboratory of Polymer Chemistry and Physics of Ministry of Education, Center for Soft Matter Science and Engineering, College of Chemistry and Molecular Engineering, Peking University, Beijing 100871, China. Email: zshen@pku.edu.cn, fanxh@pku.edu.cn

### **Table of Contents**

|                  |                                                                                                        |    |
|------------------|--------------------------------------------------------------------------------------------------------|----|
| <b>Figure S1</b> | FT-IR spectra of the precursor, donor and complexes                                                    | S2 |
| <b>Figure S2</b> | TGA traces of the donor samples                                                                        | S2 |
| <b>Figure S3</b> | Variable-temperature FT-IR spectra of the complexes                                                    | S3 |
| <b>Figure S4</b> | SAXS and WAXS profiles of D <sub>120</sub> M <sub>3</sub> H <sub>45</sub> (PHTC6) <sub>x</sub> samples | S3 |
| <b>Figure S5</b> | Apparent phase diagram of the complex                                                                  | S4 |
| <b>Figure S6</b> | Variable-temperature SAXS profiles of the complexes                                                    | S4 |
| <b>Figure S7</b> | 2D SAXS pattern of D <sub>120</sub> M <sub>3</sub> H <sub>31</sub> (PHTC6) <sub>1.0</sub>              | S5 |

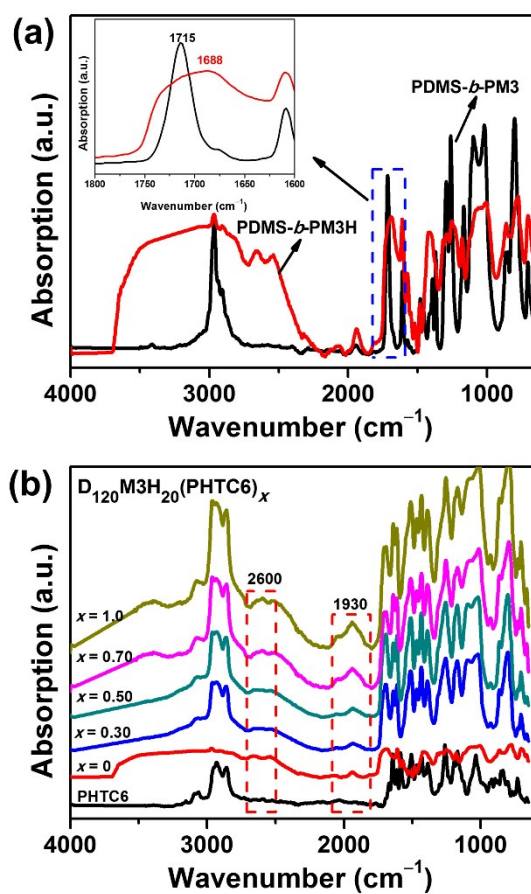

**Figure S1.** FT-IR spectra of the donor PDMS-*b*-PM3H and its precursor PDMS-*b*-PM3 (a) and those of the complexes  $D_{120}M_3H_{20}(PHTC6)_x$  with different  $x$  and the acceptor (b).

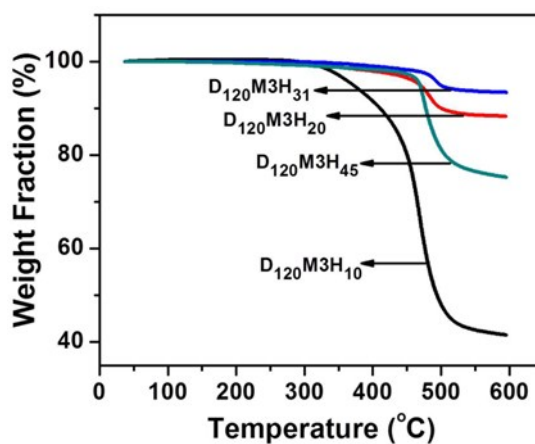

**Figure S2.** TGA traces of the donors during heating at 10 °C/min in a nitrogen atmosphere.

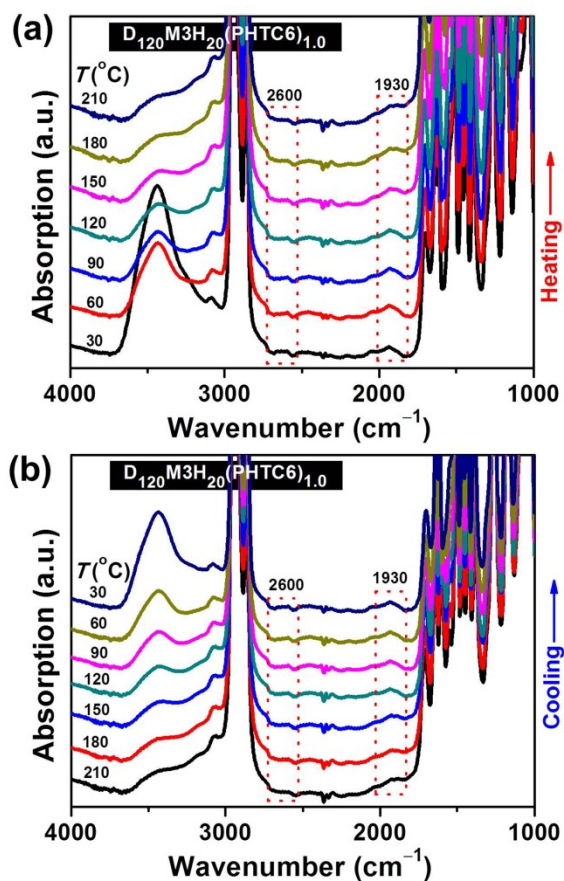

**Figure S3.** Variable-temperature FT-IR spectra of the complex  $D_{120}M3H_{20}(PHTC6)_{1.0}$  during heating (a) and cooling (b).

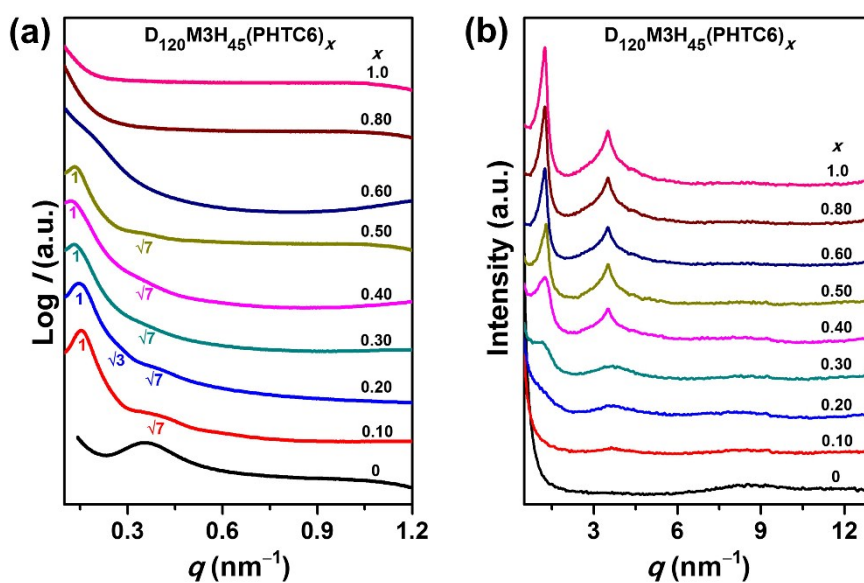

**Figure S4.** SAXS (a) and WAXS (b) profiles of the complexes  $D_{120}M3H_{20}(PHTC6)_x$  and the donor  $D_{120}M3H_{20}$ .

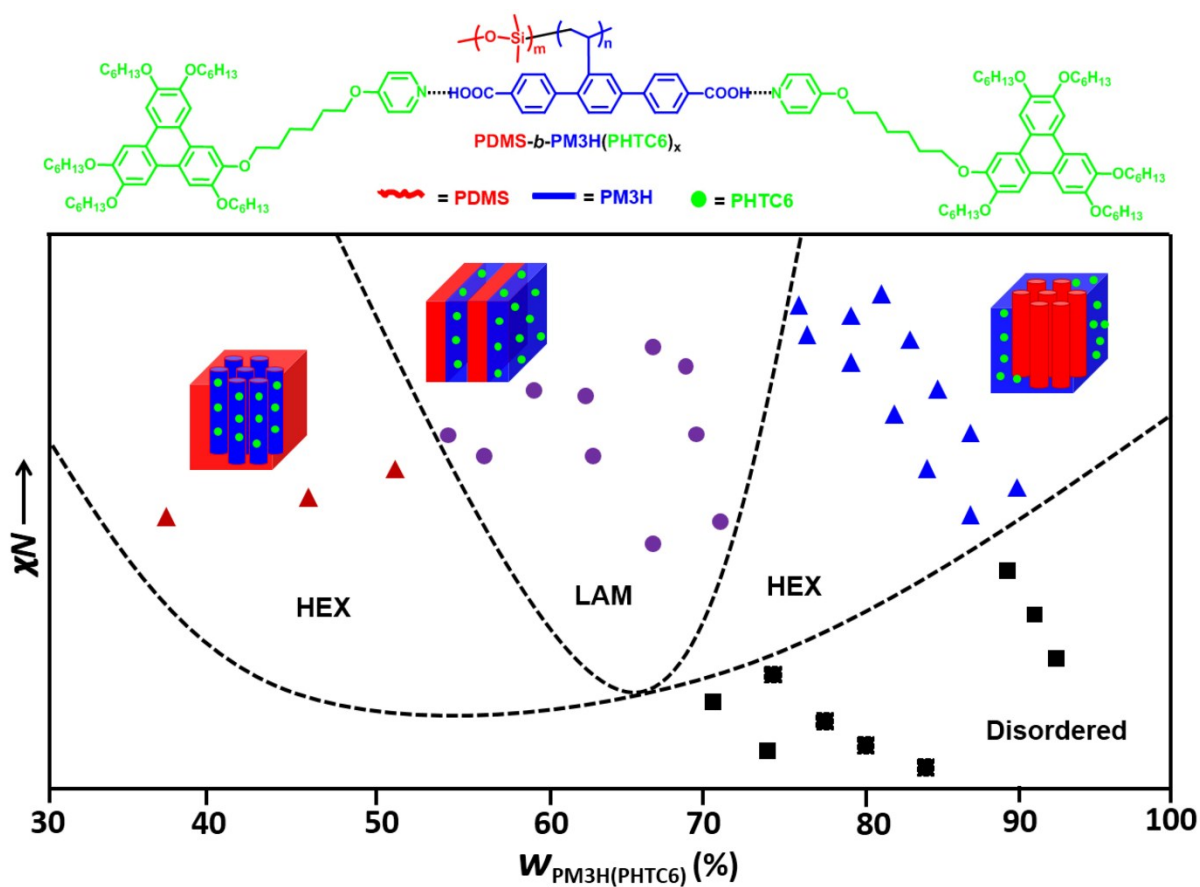

**Figure S5.** Apparent phase diagram,  $\chi N$  vs  $w_{\text{PM3H(PHTC6)}}$ , of the complex. The values of  $\chi N$  and the phase boundaries are rather arbitrary and hypothetical, without experimental proof.

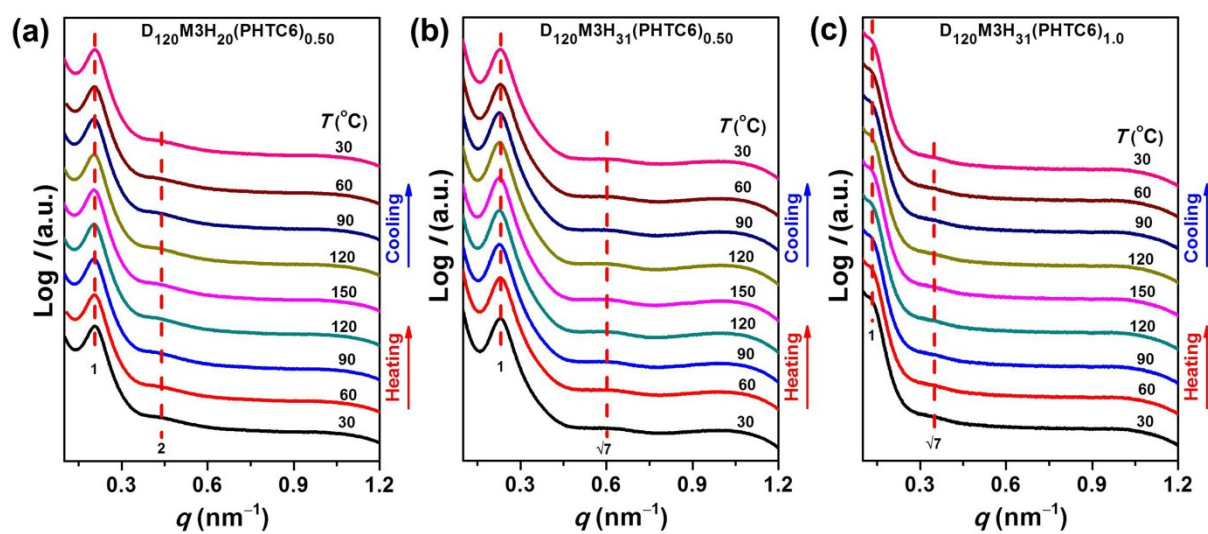

**Figure S6.** Variable-temperature SAXS profiles of the complexes (a:  $\text{D}_{120}\text{M3H}_{20}(\text{PHTC6})_{0.50}$ ; b:  $\text{D}_{120}\text{M3H}_{31}(\text{PHTC6})_{0.50}$ ; c:  $\text{D}_{120}\text{M3H}_{31}(\text{PHTC6})_{1.0}$ ).

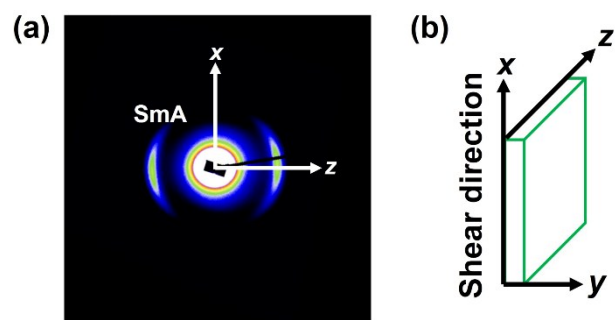

**Figure S7.** 2D SAXS pattern of  $D_{120}M_{3H_{31}}(PHTC6)_{1.0}$  (a) with the X-ray beam along the  $y$  direction and the shearing geometry (b).
